# Supplementary material for: Magnesium vapor-assisted deoxidation of La–Ce alloys through micro-alloying
Source: Royal Society of Chemistry journal article supplement (doi:10.1039/d4tc01833h), 2024-12-23
Supplement: d4tc01833h1.xlsx [file d4tc01833h1.xlsx]

## Sheet: Sheet1
2θ	I	CeMg12		La2Mg17		Ce5Mg41
5	815	12.249	50	13.404	5	10.326	5
5.0091	826	15.132	20	17.137	15	12.317	5
5.0182	694	17.07	50	21.657	10	15.784	100
5.0273	763	19.237	10	24.434	30	16.939	50
5.03641	773	22.902	20	27.857	15	18.988	50
5.04551	796	24.231	60	29.96	25	23.205	10
5.05461	772	25.802	10	31.703	10	24.098	10
5.06371	857	27.249	50	32.902	15	25.502	20
5.07281	777	28.775	10	34.604	100	26.188	10
5.08191	736	29.858	60	37.28	15	26.997	10
5.09101	719	31.137	20	38.957	10	28.966	20
5.10011	731	32.172	5	40.415	5	29.454	10
5.10921	756	33.536	60	45.067	15	30.807	5
5.11832	716	34.742	100	46.61	15	31.474	60
5.12742	747			49.989	30	32.053	60
5.13652	744			52.036	20	33.796	20
5.14562	728			53.044	5	34.33	10
5.15472	765			56.027	25	34.882	10
5.16382	733			56.477	5	35.307	60
5.17293	736			57.874	5
5.18203	776			60.897	15
5.19113	678			61.797	25
5.20023	703			62.538	25
5.20933	715			63.979	15
5.21843	710			64.828	10
5.22753	746			67.637	15
5.23663	729			69.288	10
5.24573	727			73.261	60
5.25484	742			74.677	20
5.26394	693			78.765	35
5.27304	682			79.787	15
5.28214	679			80.758	5
5.29124	729			81.713	30
5.30034	744			82.35	40
5.30944	662			83.304	30
5.31855	685			83.569	50
5.32765	665
5.33675	733
5.34585	717
5.35495	702
5.36405	687
5.37315	643
5.38225	653
5.39135	663
5.40046	668
5.40956	677
5.41866	650
5.42776	657
5.43686	697
5.44596	689
5.45506	710
5.46417	649
5.47327	650
5.48237	666
5.49147	647
5.50057	667
5.50967	632
5.51877	653
5.52787	609
5.53698	663
5.54608	645
5.55518	655
5.56428	638
5.57338	605
5.58248	609
5.59158	636
5.60069	641
5.60979	623
5.61889	665
5.62799	661
5.63709	583
5.64619	661
5.65529	627
5.66439	612
5.6735	631
5.6826	614
5.6917	584
5.7008	619
5.7099	602
5.719	613
5.7281	613
5.7372	531
5.74631	624
5.75541	606
5.76451	575
5.77361	544
5.78271	579
5.79181	558
5.80091	616
5.81001	592
5.81912	569
5.82822	606
5.83732	599
5.84642	527
5.85552	579
5.86462	571
5.87372	554
5.88282	548
5.89193	554
5.90103	604
5.91013	565
5.91923	578
5.92833	565
5.93743	583
5.94653	542
5.95564	531
5.96474	560
5.97384	531
5.98294	536
5.99204	541
6.00114	523
6.01024	580
6.01934	538
6.02844	580
6.03755	513
6.04665	508
6.05575	526
6.06485	563
6.07395	569
6.08305	521
6.09215	534
6.10126	510
6.11036	529
6.11946	525
6.12856	531
6.13766	506
6.14676	468
6.15586	457
6.16496	529
6.17407	494
6.18317	518
6.19227	518
6.20137	516
6.21047	526
6.21957	512
6.22867	535
6.23778	519
6.24688	514
6.25598	537
6.26508	522
6.27418	526
6.28328	511
6.29238	455
6.30148	489
6.31058	468
6.31969	469
6.32879	500
6.33789	460
6.34699	482
6.35609	474
6.36519	466
6.37429	454
6.3834	516
6.3925	470
6.4016	502
6.4107	463
6.4198	491
6.4289	447
6.438	461
6.4471	484
6.4562	445
6.46531	437
6.47441	485
6.48351	473
6.49261	486
6.50171	463
6.51081	457
6.51992	461
6.52902	440
6.53812	441
6.54722	424
6.55632	434
6.56542	465
6.57452	465
6.58362	440
6.59272	446
6.60183	439
6.61093	438
6.62003	424
6.62913	454
6.63823	467
6.64733	427
6.65643	468
6.66554	394
6.67464	424
6.68374	445
6.69284	423
6.70194	427
6.71104	405
6.72014	456
6.72924	428
6.73834	417
6.74745	455
6.75655	410
6.76565	424
6.77475	446
6.78385	435
6.79295	410
6.80205	416
6.81116	402
6.82026	414
6.82936	386
6.83846	386
6.84756	413
6.85666	438
6.86576	409
6.87486	414
6.88397	404
6.89307	415
6.90217	383
6.91127	365
6.92037	362
6.92947	394
6.93857	378
6.94768	406
6.95678	397
6.96588	416
6.97498	416
6.98408	424
6.99318	393
7.00228	433
7.01138	351
7.02048	404
7.02959	388
7.03869	377
7.04779	390
7.05689	380
7.06599	379
7.07509	355
7.08419	349
7.0933	406
7.1024	406
7.1115	348
7.1206	371
7.1297	361
7.1388	400
7.1479	359
7.157	371
7.16611	376
7.17521	405
7.18431	347
7.19341	384
7.20251	346
7.21161	380
7.22071	395
7.22982	344
7.23892	335
7.24802	346
7.25712	406
7.26622	360
7.27532	347
7.28442	362
7.29352	326
7.30262	366
7.31173	366
7.32083	359
7.32993	337
7.33903	336
7.34813	375
7.35723	335
7.36633	336
7.37544	339
7.38454	374
7.39364	358
7.40274	373
7.41184	338
7.42094	340
7.43004	343
7.43914	325
7.44825	385
7.45735	325
7.46645	327
7.47555	339
7.48465	315
7.49375	356
7.50285	286
7.51196	364
7.52106	332
7.53016	323
7.53926	342
7.54836	321
7.55746	314
7.56656	341
7.57566	335
7.58477	329
7.59387	332
7.60297	355
7.61207	326
7.62117	310
7.63027	337
7.63937	315
7.64847	339
7.65757	322
7.66668	347
7.67578	308
7.68488	348
7.69398	311
7.70308	326
7.71218	363
7.72128	335
7.73039	336
7.73949	332
7.74859	313
7.75769	314
7.76679	325
7.77589	341
7.78499	342
7.7941	317
7.80319	306
7.8123	334
7.8214	355
7.8305	311
7.8396	298
7.8487	309
7.8578	263
7.86691	309
7.87601	325
7.88511	329
7.89421	306
7.90331	325
7.91241	323
7.92151	326
7.93061	297
7.93971	318
7.94882	339
7.95792	322
7.96702	311
7.97612	310
7.98522	315
7.99432	300
8.00342	305
8.01253	320
8.02163	297
8.03073	295
8.03983	303
8.04893	305
8.05803	316
8.06713	343
8.07623	309
8.08534	325
8.09444	293
8.10354	293
8.11264	319
8.12174	310
8.13084	318
8.13994	314
8.14904	305
8.15815	291
8.16725	296
8.17635	301
8.18545	324
8.19455	316
8.20365	322
8.21275	324
8.22185	310
8.23096	314
8.24006	339
8.24916	288
8.25826	287
8.26736	300
8.27646	290
8.28556	320
8.29467	326
8.30377	311
8.31287	296
8.32197	294
8.33107	290
8.34017	299
8.34927	308
8.35837	329
8.36748	303
8.37658	282
8.38568	284
8.39478	298
8.40388	290
8.41298	322
8.42208	284
8.43118	292
8.44029	335
8.44939	293
8.45849	331
8.46759	318
8.47669	304
8.48579	317
8.49489	315
8.50399	315
8.5131	289
8.5222	295
8.5313	312
8.5404	302
8.5495	265
8.5586	309
8.5677	301
8.57681	266
8.58591	297
8.59501	293
8.60411	312
8.61321	272
8.62231	281
8.63141	282
8.64051	325
8.64962	282
8.65872	270
8.66782	286
8.67692	289
8.68602	265
8.69512	314
8.70422	283
8.71332	319
8.72242	298
8.73153	299
8.74063	318
8.74973	277
8.75883	269
8.76793	292
8.77703	286
8.78613	281
8.79524	297
8.80434	292
8.81344	287
8.82254	266
8.83164	299
8.84074	319
8.84984	275
8.85895	314
8.86805	287
8.87715	289
8.88625	287
8.89535	271
8.90445	270
8.91355	279
8.92265	285
8.93176	286
8.94086	296
8.94996	278
8.95906	294
8.96816	271
8.97726	272
8.98636	261
8.99546	288
9.00456	274
9.01367	277
9.02277	265
9.03187	290
9.04097	307
9.05007	311
9.05917	263
9.06827	276
9.07738	260
9.08648	271
9.09558	276
9.10468	296
9.11378	281
9.12288	282
9.13198	280
9.14109	248
9.15019	260
9.15929	283
9.16839	263
9.17749	278
9.18659	258
9.19569	267
9.20479	281
9.2139	273
9.223	269
9.2321	315
9.2412	312
9.2503	242
9.2594	267
9.2685	255
9.2776	277
9.2867	263
9.29581	268
9.30491	292
9.31401	293
9.32311	291
9.33221	263
9.34131	288
9.35041	301
9.35952	261
9.36862	271
9.37772	285
9.38682	322
9.39592	281
9.40502	279
9.41412	262
9.42322	281
9.43233	302
9.44143	275
9.45053	283
9.45963	268
9.46873	254
9.47783	258
9.48693	276
9.49603	250
9.50514	286
9.51424	270
9.52334	278
9.53244	271
9.54154	276
9.55064	271
9.55974	275
9.56884	289
9.57795	286
9.58705	263
9.59615	270
9.60525	279
9.61435	282
9.62345	260
9.63255	269
9.64166	268
9.65076	264
9.65986	246
9.66896	255
9.67806	293
9.68716	262
9.69626	269
9.70536	266
9.71447	277
9.72357	267
9.73267	267
9.74177	247
9.75087	273
9.75997	297
9.76907	281
9.77817	262
9.78727	282
9.79638	234
9.80548	281
9.81458	281
9.82368	267
9.83278	270
9.84188	269
9.85098	299
9.86009	278
9.86919	268
9.87829	265
9.88739	268
9.89649	254
9.90559	261
9.91469	290
9.9238	270
9.9329	275
9.942	266
9.9511	263
9.9602	280
9.9693	271
9.9784	301
9.9875	254
9.99661	266
10.0057	292
10.0148	291
10.0239	283
10.033	295
10.0421	298
10.0512	294
10.0603	324
10.0694	297
10.0785	300
10.0876	312
10.0967	300
10.1058	325
10.1149	311
10.124	302
10.1331	310
10.1422	331
10.1513	344
10.1604	333
10.1695	356
10.1786	388
10.1877	357
10.1968	388
10.2059	385
10.215	413
10.2241	393
10.2332	380
10.2423	405
10.2514	383
10.2605	398
10.2696	368
10.2787	372
10.2878	375
10.2969	380
10.306	386
10.3151	347
10.3242	373
10.3333	362
10.3424	357
10.3515	308
10.3606	292
10.3697	314
10.3789	308
10.388	300
10.3971	298
10.4062	304
10.4153	241
10.4244	280
10.4335	266
10.4426	286
10.4517	260
10.4608	261
10.4699	217
10.479	284
10.4881	269
10.4972	286
10.5063	274
10.5154	262
10.5245	238
10.5336	237
10.5427	272
10.5518	262
10.5609	252
10.57	279
10.5791	278
10.5882	264
10.5973	272
10.6064	275
10.6155	255
10.6246	248
10.6337	253
10.6428	246
10.6519	234
10.661	285
10.6701	293
10.6792	253
10.6883	264
10.6974	224
10.7065	241
10.7156	254
10.7247	267
10.7338	256
10.7429	245
10.752	271
10.7611	255
10.7702	256
10.7793	256
10.7884	217
10.7975	261
10.8066	270
10.8157	227
10.8248	249
10.8339	234
10.843	262
10.8521	243
10.8612	251
10.8703	232
10.8794	211
10.8885	223
10.8976	269
10.9067	236
10.9158	272
10.9249	250
10.934	237
10.9431	252
10.9522	242
10.9613	224
10.9704	251
10.9795	247
10.9886	243
10.9977	236
11.0068	219
11.0159	266
11.0251	221
11.0342	242
11.0433	239
11.0524	220
11.0615	262
11.0706	230
11.0797	238
11.0887	253
11.0979	241
11.107	253
11.1161	232
11.1252	271
11.1343	242
11.1434	249
11.1525	267
11.1616	247
11.1707	264
11.1798	248
11.1889	218
11.198	234
11.2071	238
11.2162	209
11.2253	245
11.2344	251
11.2435	252
11.2526	235
11.2617	208
11.2708	244
11.2799	236
11.289	215
11.2981	248
11.3072	225
11.3163	233
11.3254	218
11.3345	250
11.3436	220
11.3527	232
11.3618	224
11.3709	240
11.38	259
11.3891	258
11.3982	279
11.4073	238
11.4164	227
11.4255	217
11.4346	219
11.4437	227
11.4528	269
11.4619	238
11.471	249
11.4801	214
11.4892	254
11.4983	252
11.5074	225
11.5165	224
11.5256	231
11.5347	216
11.5438	244
11.5529	249
11.562	234
11.5711	222
11.5802	252
11.5893	231
11.5984	296
11.6075	235
11.6166	253
11.6257	251
11.6348	227
11.6439	231
11.653	285
11.6621	280
11.6712	236
11.6803	242
11.6894	218
11.6985	265
11.7076	301
11.7167	290
11.7258	269
11.7349	260
11.744	273
11.7531	274
11.7622	303
11.7713	291
11.7805	322
11.7896	303
11.7987	315
11.8078	343
11.8169	334
11.826	350
11.8351	376
11.8442	329
11.8533	333
11.8624	341
11.8715	400
11.8806	369
11.8897	381
11.8988	390
11.9079	359
11.917	377
11.9261	355
11.9352	386
11.9443	364
11.9534	371
11.9625	380
11.9716	367
11.9807	362
11.9898	413
11.9989	393
12.008	378
12.0171	423
12.0262	395
12.0353	389
12.0444	422
12.0535	432
12.0626	419
12.0717	467
12.0808	455
12.0899	476
12.099	466
12.1081	495
12.1172	424
12.1263	445
12.1354	435
12.1445	449
12.1536	439
12.1627	423
12.1718	407
12.1809	358
12.19	301
12.1991	282
12.2082	337
12.2173	301
12.2264	259
12.2355	238
12.2446	224
12.2537	255
12.2628	228
12.2719	252
12.281	244
12.2901	199
12.2992	241
12.3083	215
12.3174	231
12.3265	219
12.3356	259
12.3447	217
12.3538	205
12.3629	228
12.372	233
12.3811	232
12.3902	236
12.3993	218
12.4084	191
12.4175	241
12.4266	219
12.4358	238
12.4449	209
12.454	209
12.4631	203
12.4721	238
12.4812	202
12.4903	200
12.4994	229
12.5086	201
12.5177	209
12.5268	200
12.5359	227
12.545	213
12.5541	227
12.5632	227
12.5723	229
12.5814	192
12.5905	227
12.5996	219
12.6087	229
12.6178	221
12.6269	212
12.636	214
12.6451	210
12.6542	216
12.6633	234
12.6724	208
12.6815	209
12.6906	217
12.6997	200
12.7088	190
12.7179	237
12.727	211
12.7361	218
12.7452	239
12.7543	205
12.7634	208
12.7725	250
12.7816	214
12.7907	215
12.7998	239
12.8089	244
12.818	224
12.8271	198
12.8362	212
12.8453	221
12.8544	225
12.8635	238
12.8726	237
12.8817	225
12.8908	219
12.8999	199
12.909	244
12.9181	234
12.9272	223
12.9363	242
12.9454	213
12.9545	204
12.9636	210
12.9727	201
12.9818	223
12.9909	211
13	219
13.0091	208
13.0182	208
13.0273	190
13.0364	188
13.0455	186
13.0546	193
13.0637	198
13.0728	176
13.0819	211
13.091	201
13.1001	186
13.1092	189
13.1183	191
13.1274	191
13.1365	202
13.1456	247
13.1547	205
13.1639	197
13.173	213
13.1821	212
13.1912	204
13.2003	221
13.2094	178
13.2185	214
13.2276	192
13.2367	205
13.2458	205
13.2549	209
13.264	201
13.2731	221
13.2822	226
13.2913	205
13.3004	164
13.3095	215
13.3186	175
13.3277	193
13.3368	178
13.3459	234
13.355	204
13.3641	204
13.3732	195
13.3823	182
13.3914	193
13.4005	204
13.4096	182
13.4187	200
13.4278	203
13.4369	196
13.446	196
13.4551	206
13.4642	188
13.4733	172
13.4824	185
13.4915	191
13.5006	165
13.5097	185
13.5188	184
13.5279	180
13.537	177
13.5461	181
13.5552	190
13.5643	173
13.5734	198
13.5825	181
13.5916	195
13.6007	168
13.6098	184
13.6189	198
13.628	194
13.6371	219
13.6462	174
13.6553	189
13.6644	196
13.6735	181
13.6826	199
13.6917	184
13.7008	189
13.7099	204
13.719	193
13.7281	183
13.7372	195
13.7463	183
13.7554	195
13.7645	217
13.7736	194
13.7827	193
13.7918	237
13.8009	189
13.81	186
13.8191	213
13.8282	196
13.8373	180
13.8464	199
13.8555	194
13.8646	184
13.8737	180
13.8828	197
13.8919	200
13.901	205
13.9101	216
13.9192	192
13.9284	197
13.9375	186
13.9466	189
13.9557	198
13.9648	200
13.9739	190
13.983	191
13.9921	193
14.0012	165
14.0103	175
14.0194	201
14.0285	191
14.0376	215
14.0467	164
14.0558	191
14.0649	219
14.074	212
14.0831	209
14.0922	179
14.1013	179
14.1104	164
14.1195	174
14.1286	187
14.1377	184
14.1468	177
14.1559	163
14.165	193
14.1741	180
14.1832	187
14.1923	171
14.2014	176
14.2105	174
14.2196	184
14.2287	195
14.2378	165
14.2469	199
14.256	158
14.2651	179
14.2742	195
14.2833	170
14.2924	200
14.3015	180
14.3106	204
14.3197	165
14.3288	182
14.3379	168
14.347	189
14.3561	173
14.3652	156
14.3743	191
14.3834	168
14.3925	175
14.4016	174
14.4107	182
14.4198	172
14.4289	212
14.438	191
14.4471	190
14.4562	181
14.4653	157
14.4744	170
14.4835	179
14.4926	176
14.5017	169
14.5108	192
14.5199	184
14.529	197
14.5381	194
14.5472	184
14.5563	183
14.5655	184
14.5746	199
14.5837	193
14.5928	163
14.6019	201
14.611	194
14.6201	179
14.6291	169
14.6383	184
14.6474	184
14.6565	187
14.6656	166
14.6747	185
14.6838	192
14.6929	171
14.702	194
14.7111	204
14.7202	203
14.7293	212
14.7384	199
14.7475	198
14.7566	214
14.7657	198
14.7748	231
14.7839	243
14.793	219
14.8021	250
14.8112	254
14.8203	258
14.8294	255
14.8385	297
14.8476	294
14.8567	266
14.8658	310
14.8749	276
14.884	282
14.8931	318
14.9022	290
14.9113	281
14.9204	280
14.9295	267
14.9386	282
14.9477	266
14.9568	254
14.9659	240
14.975	236
14.9841	273
14.9932	231
15.0023	228
15.0114	209
15.0205	204
15.0296	205
15.0387	181
15.0478	182
15.0569	200
15.066	181
15.0751	161
15.0842	201
15.0933	176
15.1024	211
15.1115	173
15.1206	200
15.1297	196
15.1388	176
15.1479	170
15.157	174
15.1661	188
15.1752	178
15.1843	166
15.1934	173
15.2025	174
15.2116	174
15.2207	206
15.2298	173
15.2389	151
15.248	178
15.2571	188
15.2662	185
15.2753	168
15.2844	165
15.2935	156
15.3026	168
15.3117	186
15.3209	178
15.33	177
15.3391	173
15.3482	196
15.3573	180
15.3664	208
15.3755	188
15.3846	196
15.3937	169
15.4028	194
15.4119	199
15.421	178
15.4301	192
15.4392	197
15.4483	172
15.4574	148
15.4665	211
15.4756	189
15.4847	213
15.4938	185
15.5029	196
15.512	175
15.5211	173
15.5302	198
15.5393	203
15.5484	211
15.5575	192
15.5666	192
15.5757	191
15.5848	195
15.5939	188
15.603	211
15.6121	206
15.6212	189
15.6303	201
15.6394	191
15.6485	176
15.6576	187
15.6667	179
15.6758	189
15.6849	195
15.694	200
15.7031	175
15.7122	177
15.7213	170
15.7304	193
15.7395	164
15.7486	171
15.7577	154
15.7668	150
15.7759	173
15.785	149
15.7941	163
15.8032	177
15.8123	158
15.8214	161
15.8305	182
15.8396	171
15.8487	168
15.8578	164
15.8669	172
15.876	164
15.8851	163
15.8942	137
15.9033	152
15.9124	157
15.9215	149
15.9306	148
15.9397	155
15.9488	163
15.9579	163
15.967	161
15.9762	168
15.9853	163
15.9944	167
16.0035	170
16.0126	144
16.0217	148
16.0308	172
16.0399	158
16.049	162
16.0581	163
16.0672	161
16.0763	162
16.0854	157
16.0945	153
16.1036	168
16.1127	157
16.1218	169
16.1309	160
16.14	155
16.1491	164
16.1582	179
16.1673	164
16.1764	156
16.1855	140
16.1946	133
16.2037	157
16.2128	174
16.2219	173
16.231	168
16.2401	177
16.2492	166
16.2583	134
16.2674	191
16.2765	181
16.2856	152
16.2947	157
16.3038	177
16.3129	146
16.322	146
16.3311	142
16.3402	156
16.3493	154
16.3584	170
16.3675	134
16.3766	159
16.3857	158
16.3948	154
16.4039	152
16.413	167
16.4221	151
16.4312	164
16.4403	152
16.4494	162
16.4585	141
16.4676	138
16.4767	173
16.4858	153
16.4949	145
16.504	181
16.5131	178
16.5222	179
16.5313	156
16.5404	162
16.5495	195
16.5586	166
16.5677	172
16.5768	173
16.5859	195
16.595	187
16.6041	182
16.6132	181
16.6223	160
16.6314	180
16.6405	176
16.6496	181
16.6587	202
16.6678	197
16.6769	200
16.6861	214
16.6952	191
16.7042	199
16.7133	220
16.7224	245
16.7315	240
16.7406	228
16.7497	220
16.7589	280
16.768	284
16.7771	294
16.7862	281
16.7953	292
16.8044	348
16.8135	389
16.8226	424
16.8317	470
16.8408	470
16.8499	532
16.859	578
16.8681	534
16.8772	580
16.8863	623
16.8954	692
16.9045	724
16.9136	690
16.9227	781
16.9318	765
16.9409	759
16.95	731
16.9591	729
16.9682	677
16.9773	629
16.9864	631
16.9955	560
17.0046	554
17.0137	495
17.0228	475
17.0319	417
17.041	342
17.0501	333
17.0592	289
17.0683	265
17.0774	255
17.0865	230
17.0956	194
17.1047	201
17.1138	186
17.1229	182
17.132	182
17.1411	190
17.1502	150
17.1593	189
17.1684	163
17.1775	186
17.1866	171
17.1957	145
17.2048	163
17.2139	191
17.223	168
17.2321	173
17.2412	155
17.2503	175
17.2594	162
17.2685	144
17.2776	155
17.2867	155
17.2958	156
17.3049	136
17.314	160
17.3231	161
17.3322	141
17.3413	170
17.3504	159
17.3595	133
17.3686	154
17.3777	145
17.3868	141
17.3959	154
17.405	143
17.4141	147
17.4232	158
17.4323	148
17.4414	162
17.4505	140
17.4597	140
17.4688	161
17.4779	161
17.487	172
17.4961	157
17.5052	163
17.5143	152
17.5234	130
17.5325	147
17.5416	140
17.5507	167
17.5598	161
17.5689	143
17.578	140
17.5871	147
17.5962	137
17.6053	148
17.6144	169
17.6235	161
17.6326	183
17.6417	166
17.6508	161
17.6599	150
17.669	139
17.6781	133
17.6872	143
17.6963	152
17.7054	138
17.7145	161
17.7236	132
17.7327	147
17.7418	140
17.7509	147
17.76	141
17.7691	149
17.7782	140
17.7873	141
17.7964	129
17.8055	163
17.8146	151
17.8237	143
17.8328	145
17.8419	151
17.851	165
17.8601	143
17.8692	151
17.8783	152
17.8874	133
17.8965	121
17.9056	156
17.9147	151
17.9238	127
17.9329	151
17.942	150
17.9511	154
17.9602	129
17.9693	148
17.9784	138
17.9875	154
17.9966	143
18.0057	137
18.0148	146
18.0239	144
18.033	122
18.0421	135
18.0512	131
18.0603	120
18.0694	143
18.0785	124
18.0876	134
18.0967	138
18.1059	133
18.115	140
18.1241	111
18.1332	142
18.1423	134
18.1514	131
18.1605	125
18.1696	155
18.1787	146
18.1878	143
18.1969	126
18.206	124
18.2151	139
18.2242	153
18.2333	142
18.2424	138
18.2515	153
18.2606	133
18.2697	127
18.2788	141
18.2879	124
18.297	133
18.3061	126
18.3152	136
18.3243	146
18.3334	150
18.3425	139
18.3516	146
18.3607	139
18.3698	165
18.3789	149
18.388	135
18.3971	121
18.4062	140
18.4153	137
18.4244	157
18.4335	142
18.4426	127
18.4517	129
18.4608	128
18.4699	124
18.479	134
18.4881	117
18.4972	163
18.5063	127
18.5154	134
18.5245	121
18.5336	138
18.5427	135
18.5518	161
18.5609	133
18.57	147
18.5791	134
18.5882	123
18.5973	136
18.6064	130
18.6155	160
18.6246	129
18.6337	155
18.6428	158
18.6519	172
18.661	141
18.6701	153
18.6792	160
18.6883	146
18.6974	131
18.7065	154
18.7156	150
18.7247	160
18.7338	127
18.7429	166
18.752	131
18.7611	131
18.7702	126
18.7793	135
18.7884	161
18.7975	138
18.8066	156
18.8158	134
18.8249	143
18.834	162
18.8431	139
18.8522	135
18.8612	132
18.8703	131
18.8794	114
18.8886	153
18.8977	140
18.9068	139
18.9159	138
18.925	129
18.9341	139
18.9432	140
18.9523	143
18.9614	154
18.9705	130
18.9796	126
18.9887	165
18.9978	158
19.0069	138
19.016	155
19.0251	163
19.0342	163
19.0433	155
19.0524	164
19.0615	197
19.0706	215
19.0797	184
19.0888	204
19.0979	177
19.107	202
19.1161	202
19.1252	212
19.1343	215
19.1434	217
19.1525	192
19.1616	215
19.1707	202
19.1798	195
19.1889	182
19.198	193
19.2071	171
19.2162	170
19.2253	158
19.2344	158
19.2435	131
19.2526	151
19.2617	156
19.2708	116
19.2799	142
19.289	139
19.2981	125
19.3072	145
19.3163	135
19.3254	142
19.3345	121
19.3436	121
19.3527	152
19.3618	117
19.3709	129
19.38	137
19.3891	115
19.3982	126
19.4073	140
19.4164	152
19.4255	130
19.4346	132
19.4437	125
19.4528	131
19.4619	142
19.471	145
19.4801	139
19.4892	140
19.4983	107
19.5074	120
19.5165	139
19.5256	122
19.5347	101
19.5438	113
19.5529	129
19.562	132
19.5711	127
19.5802	116
19.5893	124
19.5985	124
19.6076	127
19.6167	152
19.6258	127
19.6349	148
19.644	148
19.6531	107
19.6622	120
19.6713	125
19.6804	150
19.6895	142
19.6986	117
19.7077	116
19.7168	120
19.7259	122
19.735	130
19.7441	140
19.7532	120
19.7623	137
19.7714	128
19.7805	102
19.7896	121
19.7987	119
19.8078	126
19.8169	126
19.826	126
19.8351	118
19.8442	137
19.8533	114
19.8624	146
19.8715	110
19.8806	132
19.8897	124
19.8988	142
19.9079	145
19.917	137
19.9261	115
19.9352	131
19.9443	128
19.9534	129
19.9625	130
19.9716	124
19.9807	115
19.9898	134
19.9989	140
20.008	132
20.0171	131
20.0262	111
20.0353	141
20.0444	142
20.0535	106
20.0626	122
20.0717	119
20.0808	118
20.0899	135
20.099	139
20.1081	128
20.1172	115
20.1263	108
20.1354	138
20.1445	145
20.1536	107
20.1627	134
20.1718	119
20.1809	115
20.19	144
20.1991	120
20.2082	131
20.2173	126
20.2264	128
20.2355	109
20.2447	132
20.2538	136
20.2629	141
20.272	149
20.2811	163
20.2902	139
20.2993	143
20.3084	165
20.3175	146
20.3266	155
20.3357	159
20.3448	194
20.3539	176
20.363	179
20.3721	148
20.3812	196
20.3903	159
20.3994	192
20.4085	157
20.4176	176
20.4267	169
20.4358	170
20.4449	158
20.454	168
20.4631	149
20.4722	157
20.4813	143
20.4904	153
20.4995	130
20.5086	149
20.5177	150
20.5268	156
20.5359	127
20.545	134
20.5541	141
20.5632	140
20.5723	138
20.5814	151
20.5905	130
20.5996	146
20.6087	157
20.6178	132
20.6269	134
20.636	158
20.6451	164
20.6542	162
20.6633	164
20.6724	154
20.6815	149
20.6906	165
20.6997	201
20.7088	163
20.7179	164
20.727	215
20.7361	215
20.7452	175
20.7543	196
20.7634	239
20.7725	246
20.7816	245
20.7907	261
20.7998	281
20.8089	295
20.818	319
20.8271	352
20.8362	345
20.8453	349
20.8544	377
20.8635	395
20.8726	409
20.8817	390
20.8908	408
20.8999	403
20.909	391
20.9181	406
20.9272	378
20.9364	358
20.9455	336
20.9546	345
20.9637	295
20.9728	286
20.9819	283
20.991	269
21.0001	216
21.0092	210
21.0183	198
21.0274	192
21.0365	180
21.0456	216
21.0547	151
21.0638	170
21.0729	158
21.082	160
21.0911	152
21.1002	140
21.1093	148
21.1184	161
21.1275	130
21.1366	128
21.1457	150
21.1548	140
21.1639	148
21.173	145
21.1821	139
21.1912	140
21.2003	128
21.2094	160
21.2185	143
21.2276	134
21.2367	148
21.2458	105
21.2549	141
21.264	155
21.2731	151
21.2822	121
21.2913	125
21.3004	134
21.3095	143
21.3186	144
21.3277	162
21.3368	135
21.3459	137
21.355	140
21.3641	150
21.3732	150
21.3823	149
21.3914	157
21.4005	155
21.4096	163
21.4187	150
21.4278	152
21.4369	152
21.446	128
21.4551	129
21.4642	133
21.4733	164
21.4824	132
21.4915	141
21.5006	134
21.5097	131
21.5188	133
21.5279	111
21.537	130
21.5461	121
21.5552	105
21.5643	125
21.5734	132
21.5825	131
21.5916	139
21.6007	110
21.6098	124
21.6189	107
21.628	118
21.6371	126
21.6462	112
21.6553	125
21.6644	128
21.6735	115
21.6826	110
21.6917	113
21.7008	116
21.7099	124
21.719	141
21.7282	102
21.7373	118
21.7464	127
21.7555	134
21.7646	138
21.7737	113
21.7828	131
21.7919	123
21.801	129
21.8101	118
21.8192	109
21.8283	121
21.8374	118
21.8465	129
21.8556	116
21.8647	98
21.8738	122
21.8829	120
21.892	117
21.9011	119
21.9102	97
21.9193	123
21.9284	119
21.9375	113
21.9466	122
21.9557	119
21.9648	128
21.9739	115
21.983	101
21.9921	111
22.0012	144
22.0103	147
22.0194	108
22.0285	113
22.0376	143
22.0467	117
22.0558	124
22.0649	124
22.074	114
22.0831	112
22.0922	99
22.1013	119
22.1104	103
22.1195	123
22.1286	103
22.1377	139
22.1468	146
22.1559	120
22.165	116
22.1741	140
22.1832	102
22.1923	135
22.2014	128
22.2105	128
22.2196	129
22.2287	129
22.2378	132
22.2469	119
22.256	125
22.2651	134
22.2742	120
22.2833	145
22.2924	144
22.3015	127
22.3106	133
22.3197	127
22.3288	127
22.3379	142
22.347	122
22.3561	108
22.3652	130
22.3743	116
22.3834	146
22.3925	143
22.4017	113
22.4108	129
22.4199	128
22.429	119
22.4381	114
22.4472	122
22.4563	141
22.4654	143
22.4745	142
22.4836	120
22.4927	114
22.5018	121
22.5109	118
22.52	131
22.5291	139
22.5382	139
22.5473	157
22.5564	154
22.5655	177
22.5746	162
22.5837	161
22.5928	163
22.6019	177
22.611	206
22.6201	200
22.6292	239
22.6383	267
22.6474	263
22.6565	284
22.6656	282
22.6747	281
22.6838	296
22.6929	294
22.702	315
22.7111	308
22.7202	296
22.7293	304
22.7384	314
22.7475	293
22.7566	277
22.7657	230
22.7748	252
22.7839	220
22.793	223
22.8021	199
22.8112	199
22.8203	193
22.8294	185
22.8385	162
22.8476	148
22.8567	150
22.8658	159
22.8749	151
22.884	152
22.8931	137
22.9022	128
22.9113	139
22.9204	119
22.9295	131
22.9386	125
22.9477	130
22.9568	127
22.9659	132
22.975	112
22.9841	119
22.9932	113
23.0023	132
23.0114	135
23.0205	145
23.0296	143
23.0387	115
23.0478	132
23.057	122
23.0661	131
23.0752	134
23.0843	99
23.0934	122
23.1025	120
23.1116	125
23.1207	108
23.1298	129
23.1389	125
23.148	124
23.1571	115
23.1662	120
23.1753	111
23.1844	136
[truncated: 7,342 more rows]
